# Supplementary material
Source: PubMed Central journal article supplement (PMC8039060)

### Average CTCF Site

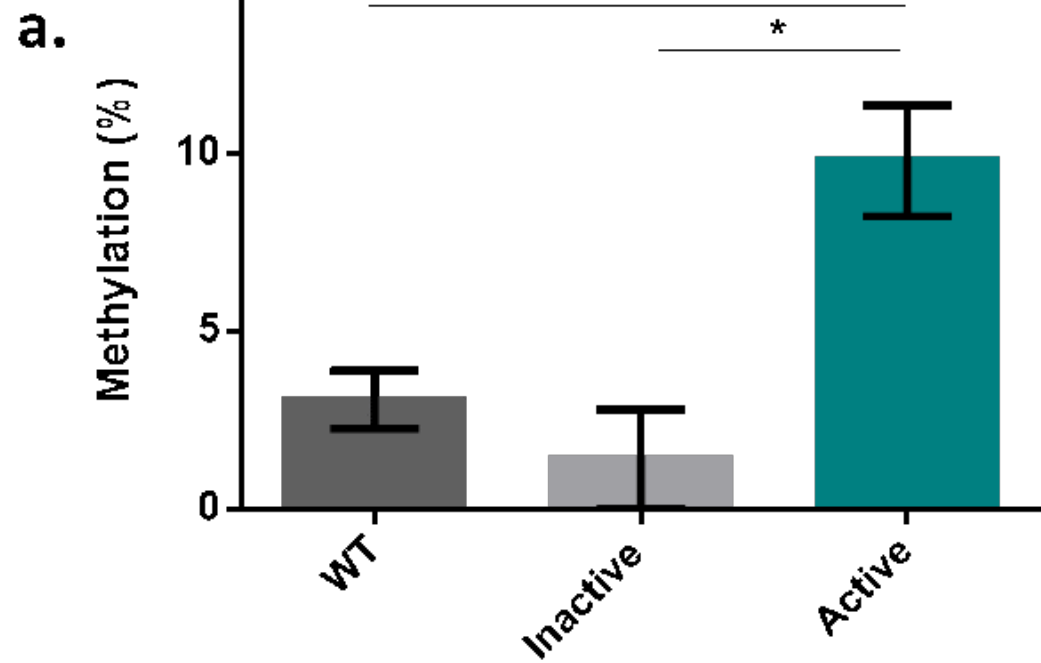

### *IRX1* off-target control

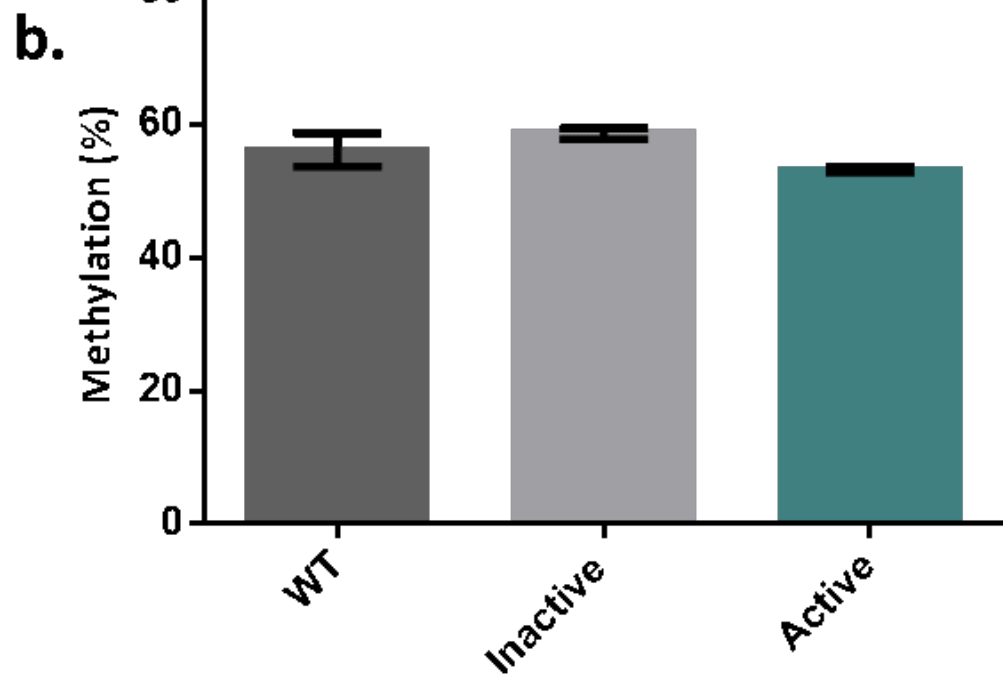

Supplement: NIHMS1634345-supplement-10.pdf [file NIHMS1634345-supplement-10.pdf]

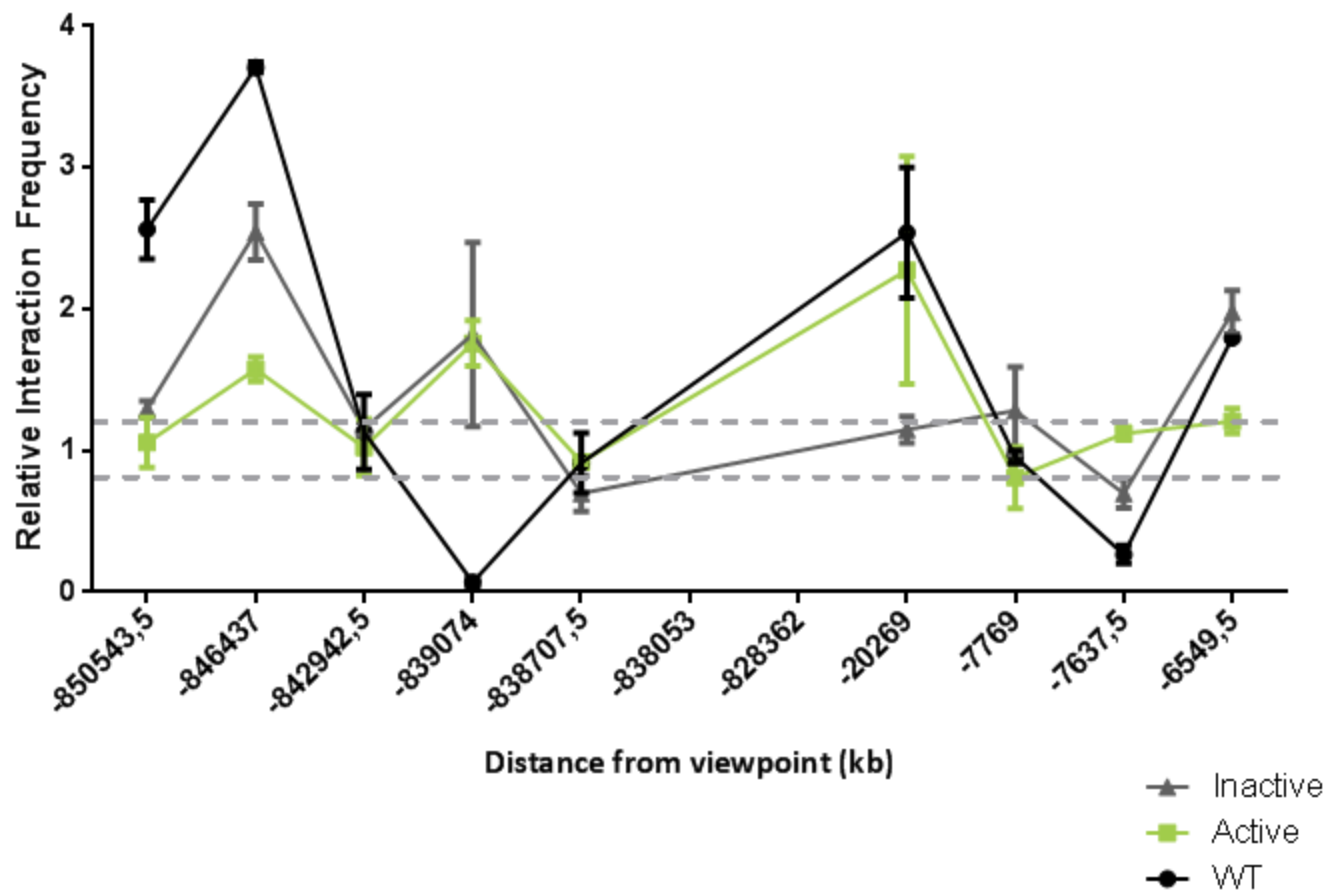

Supplement: NIHMS1634345-supplement-11.pdf [file NIHMS1634345-supplement-11.pdf]

**a.**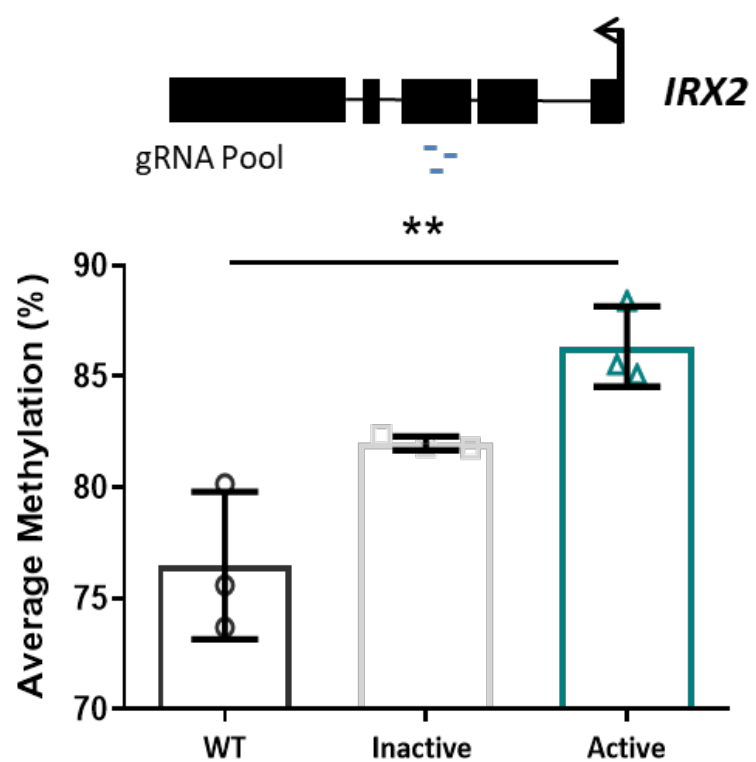**b.**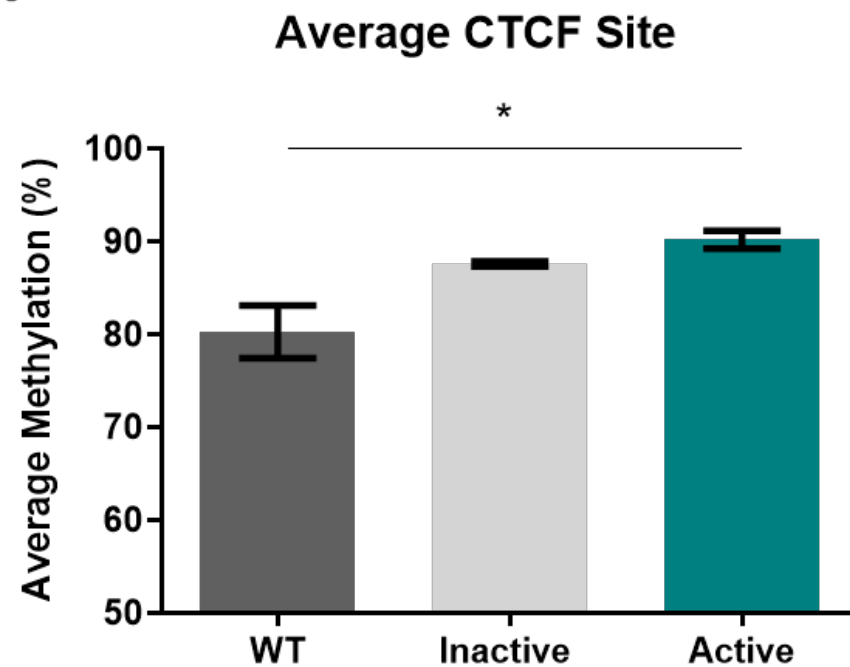**c.**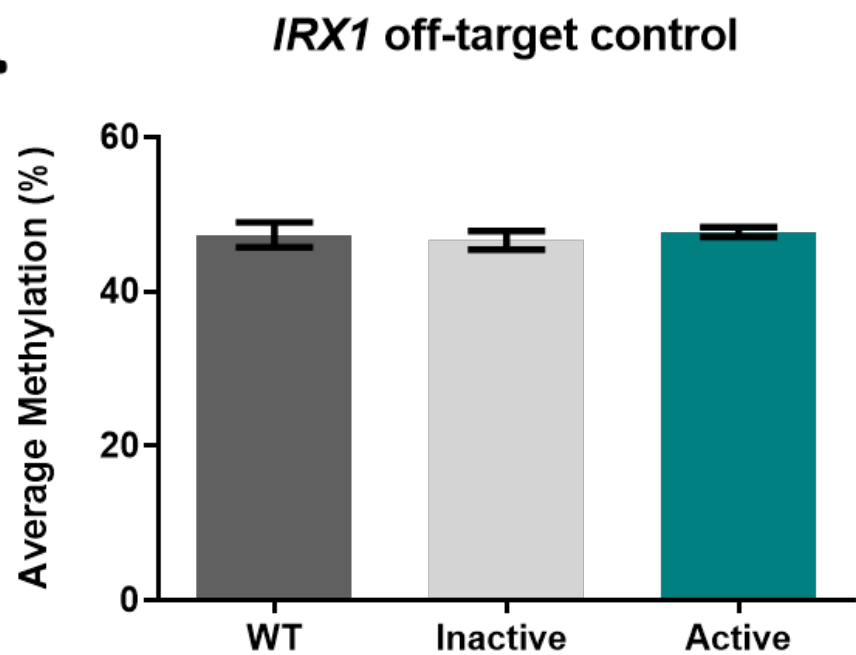**d.**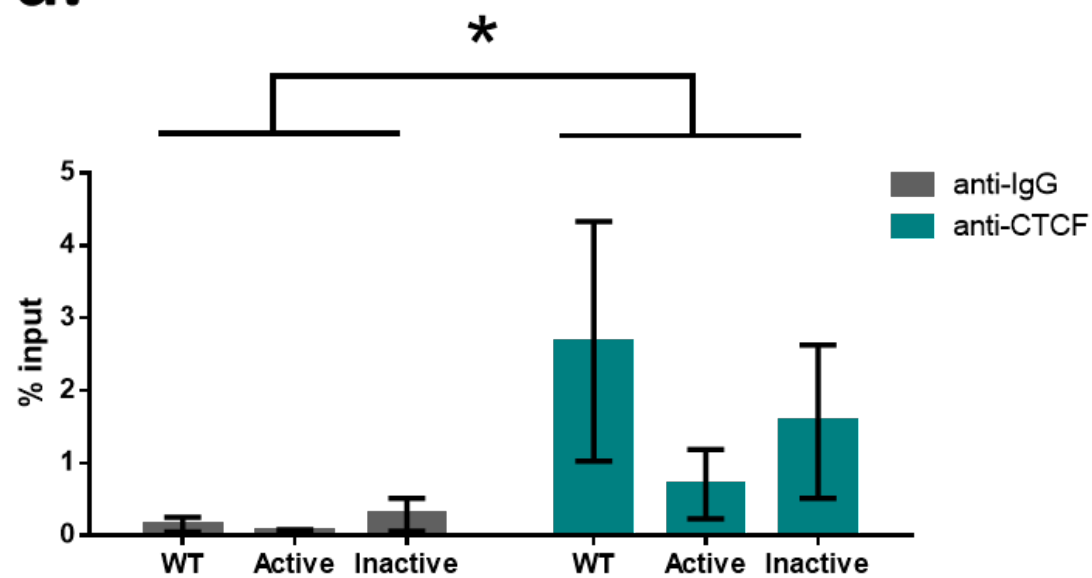

Supplement: NIHMS1634345-supplement-12.pdf [file NIHMS1634345-supplement-12.pdf]

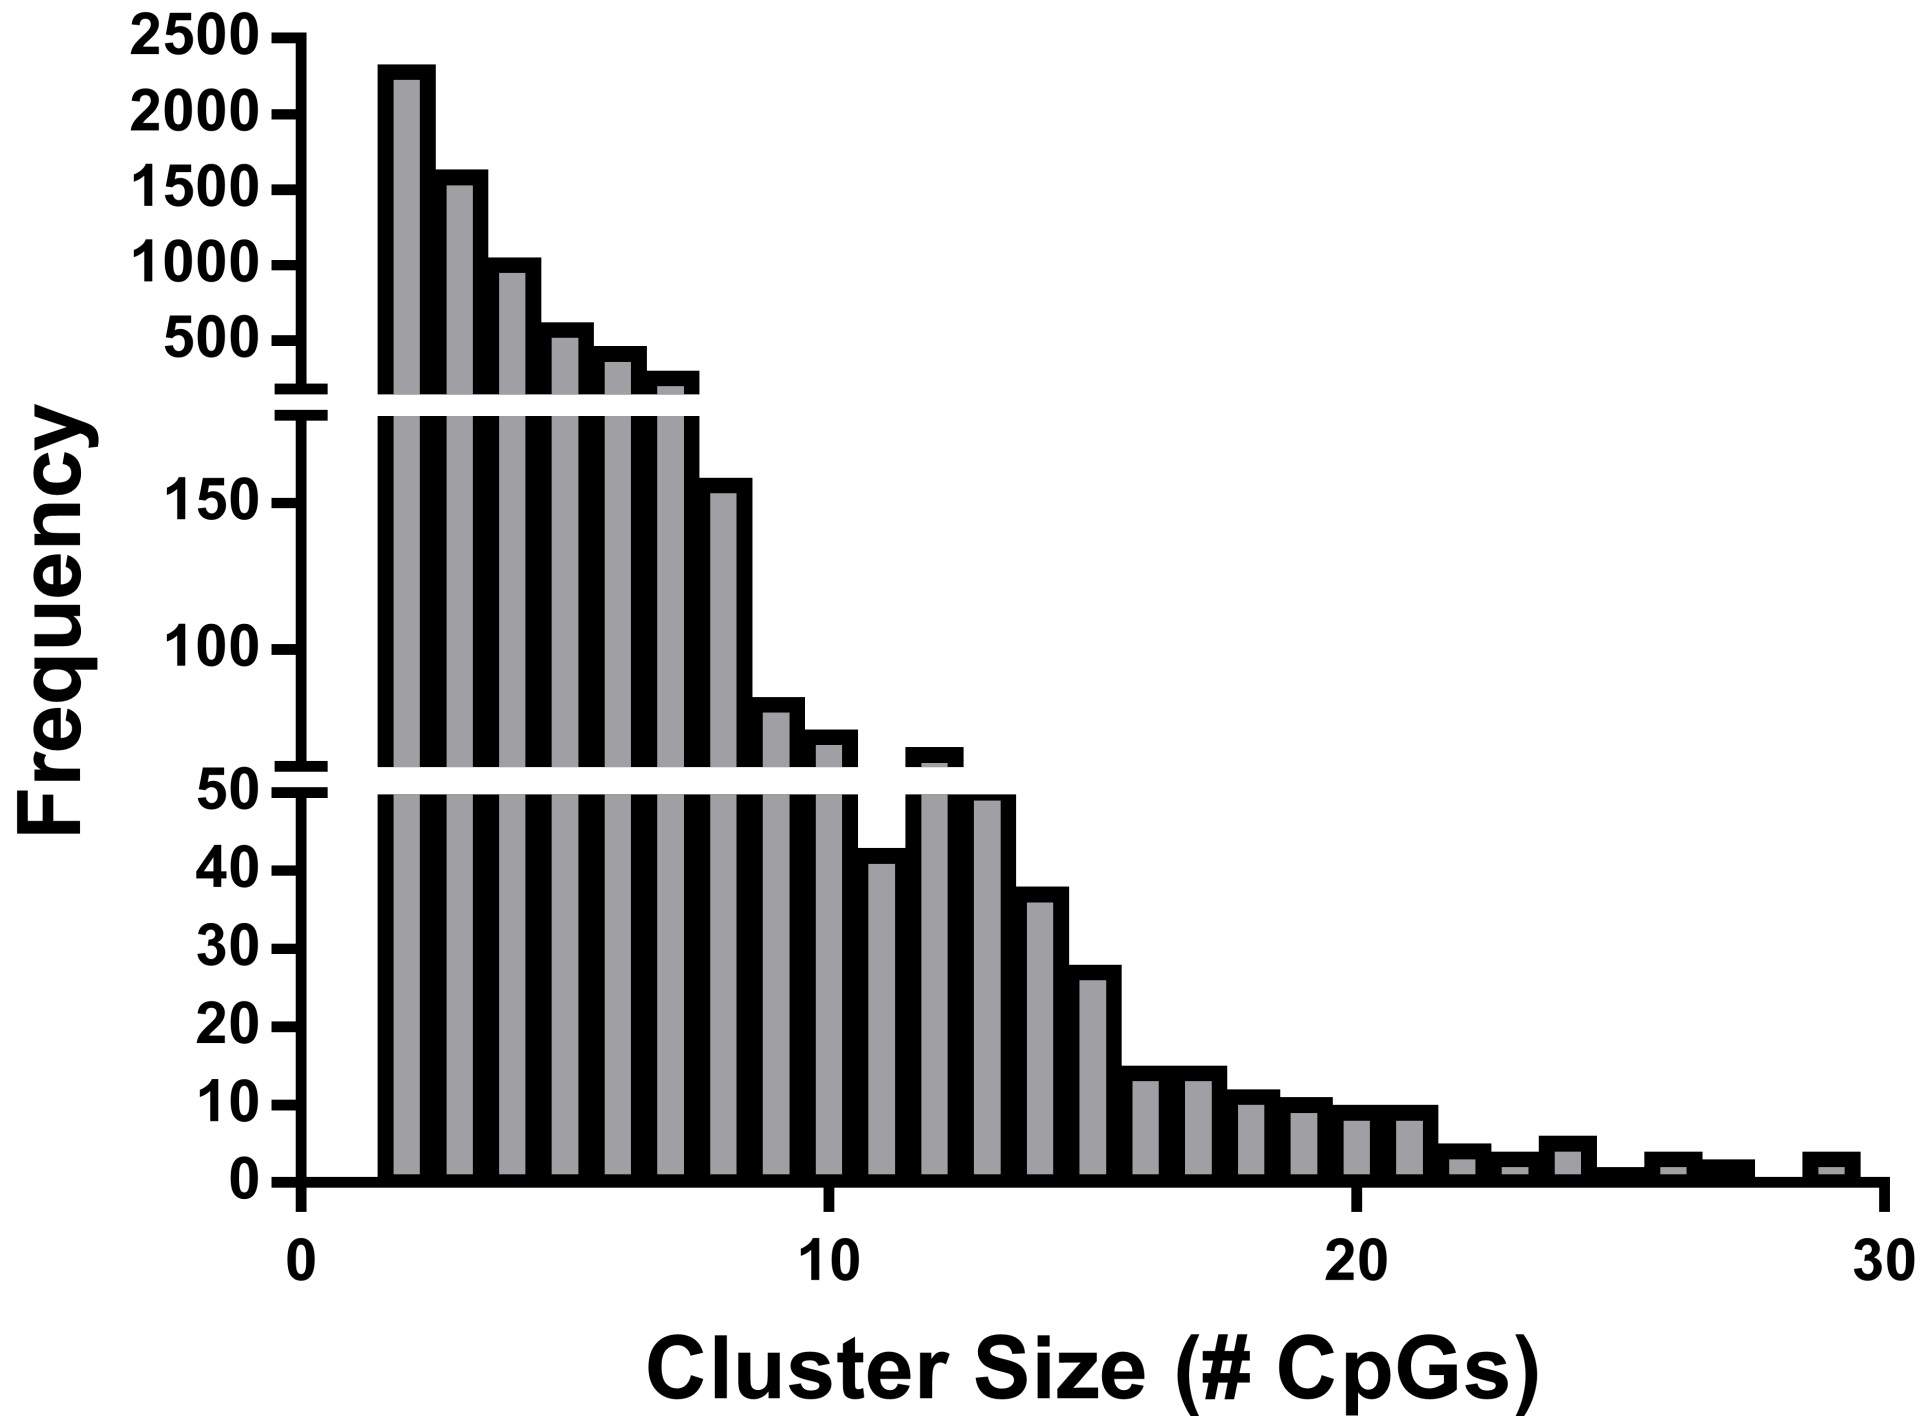

Supplement: NIHMS1634345-supplement-2.pdf [file NIHMS1634345-supplement-2.pdf]

a.

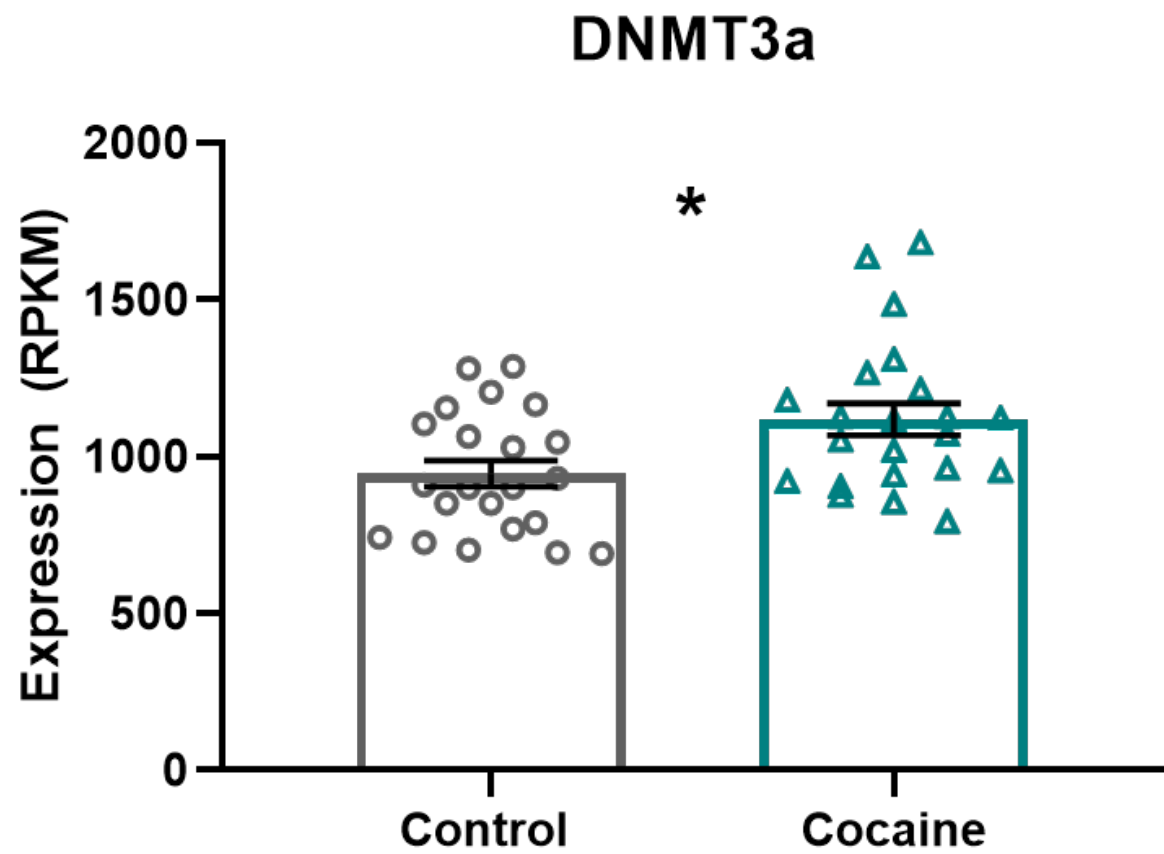

b.

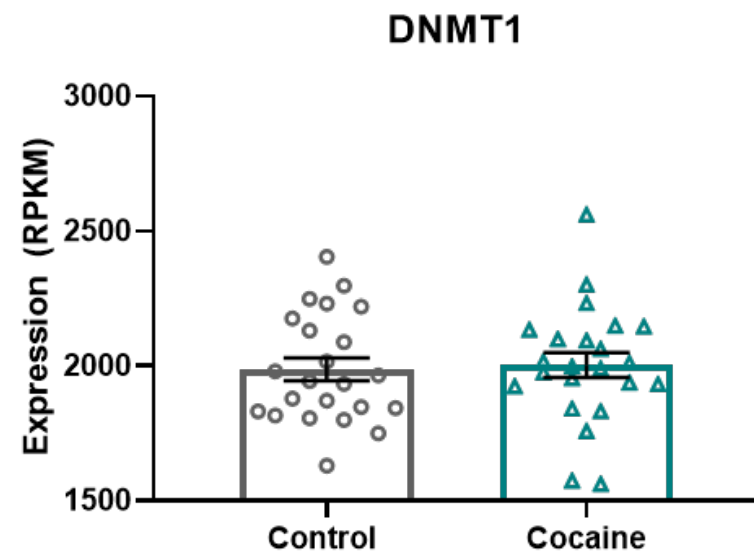

c.

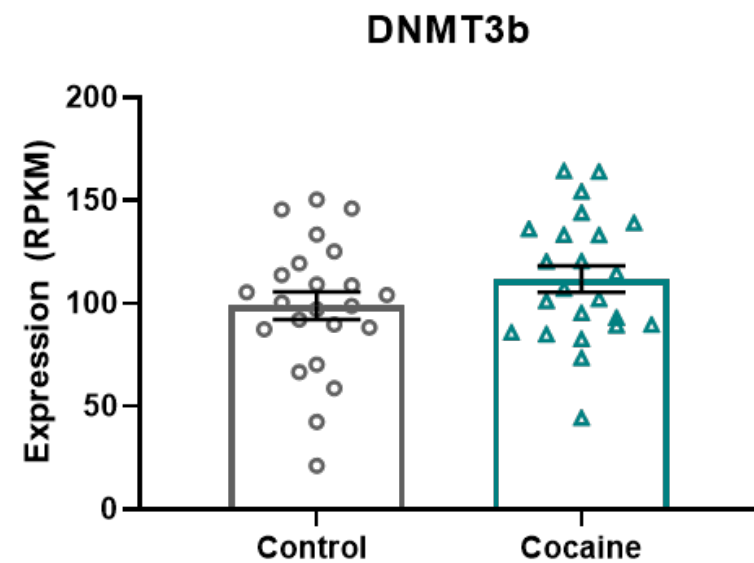

Supplement: NIHMS1634345-supplement-3.pdf [file NIHMS1634345-supplement-3.pdf]

**a.**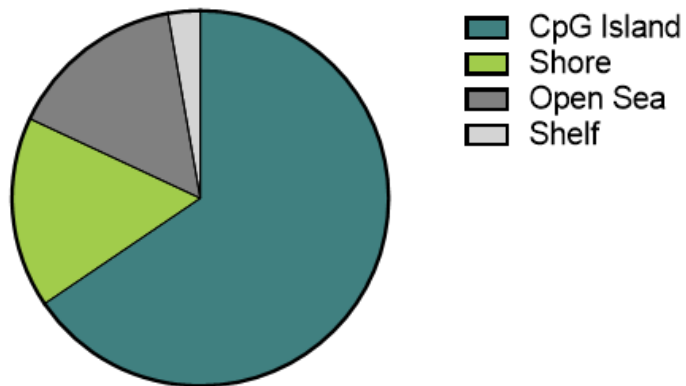**b.**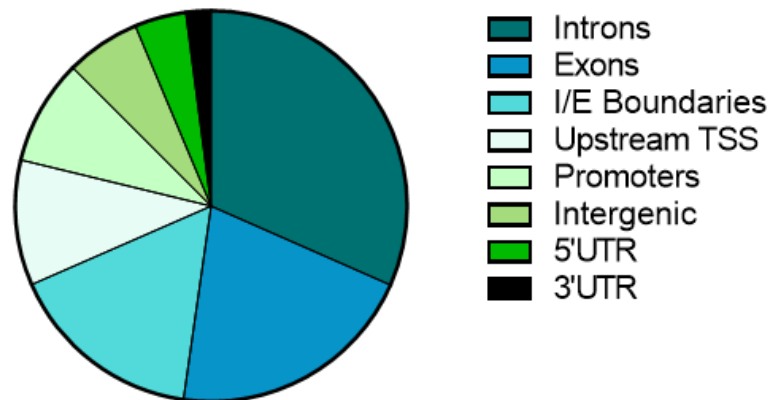**c.****chromHMM All CpG Clusters**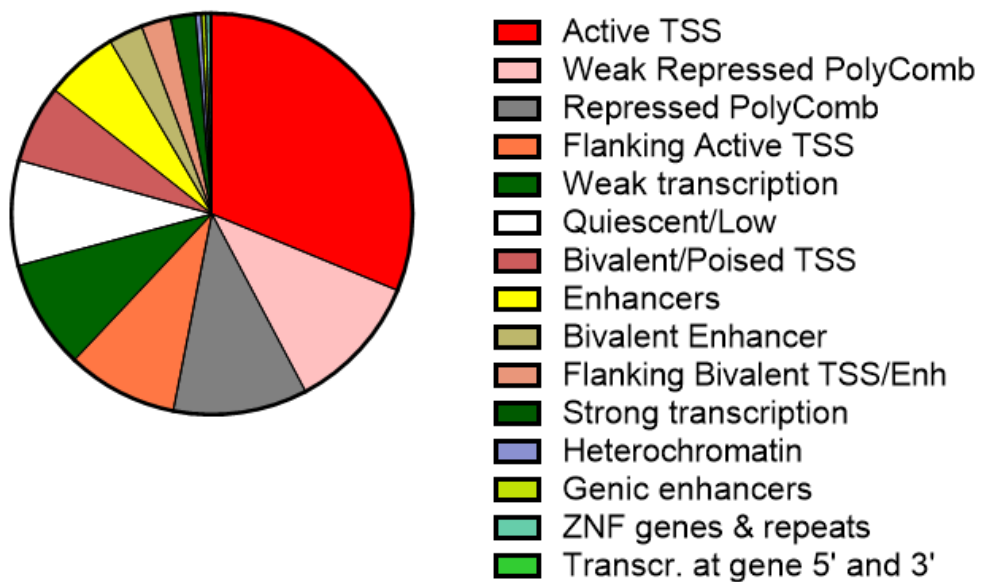**d.****chromHMM FDR Clusters**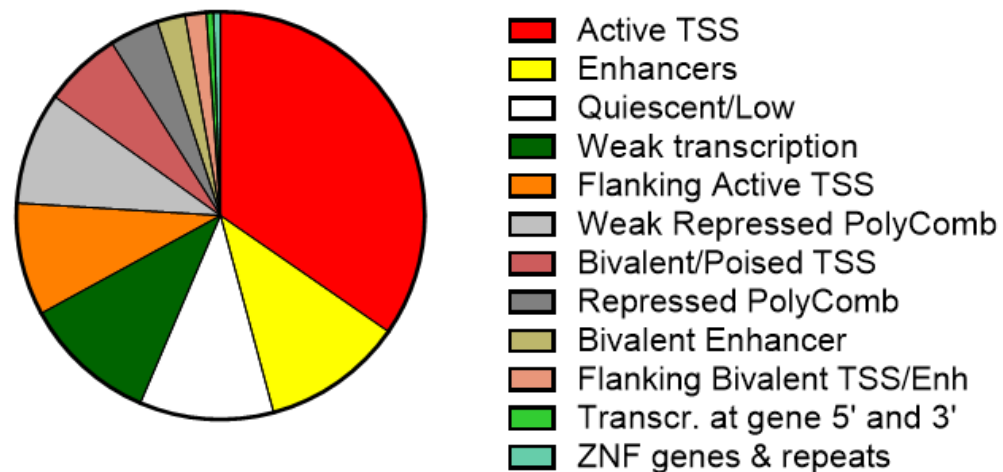

Supplement: NIHMS1634345-supplement-4.pdf [file NIHMS1634345-supplement-4.pdf]

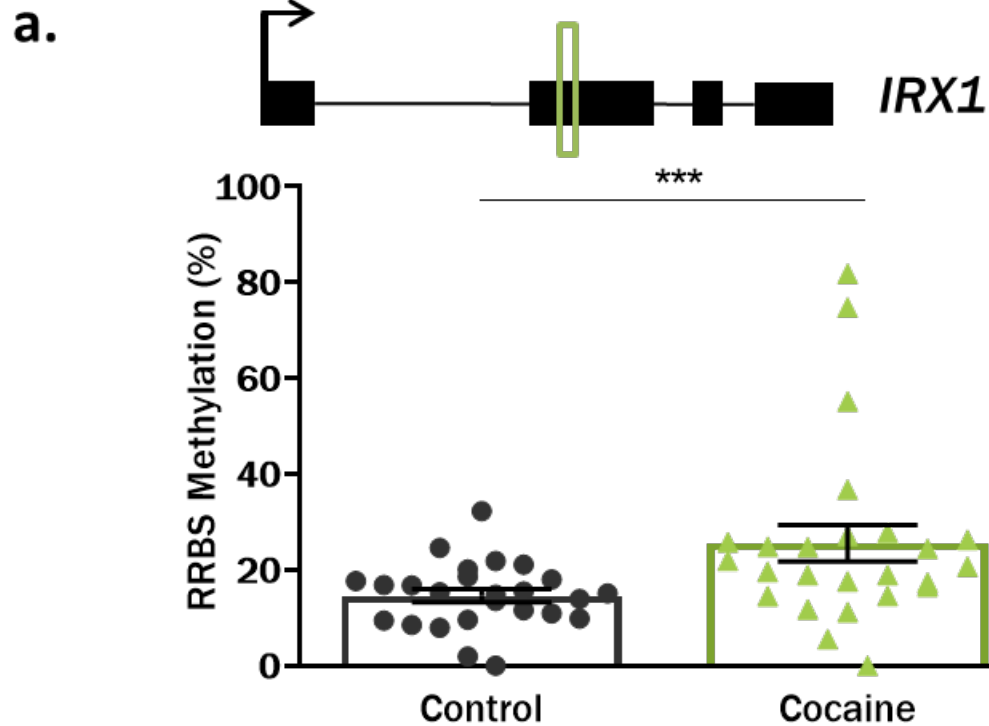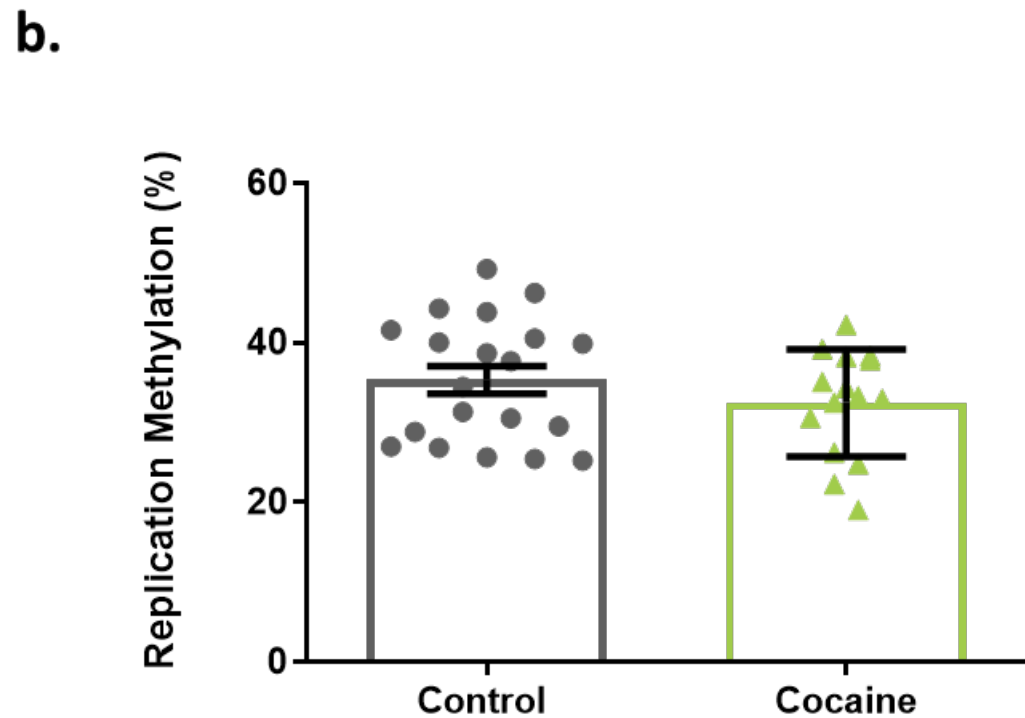

Supplement: NIHMS1634345-supplement-5.pdf [file NIHMS1634345-supplement-5.pdf]

**a.**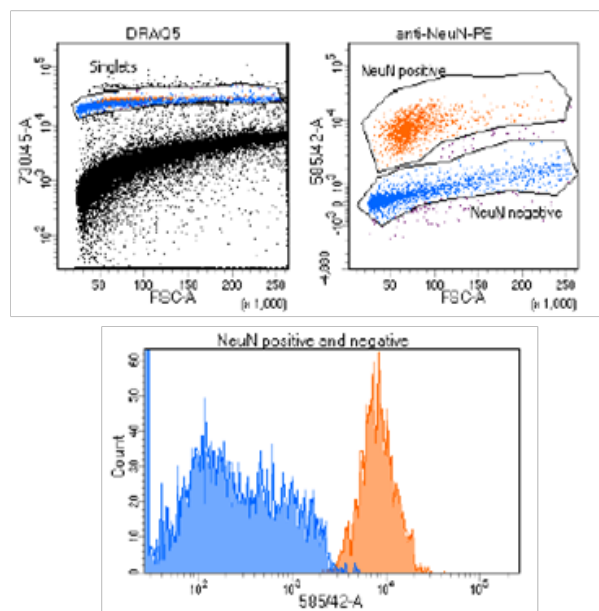**b.****NeuN+ fraction**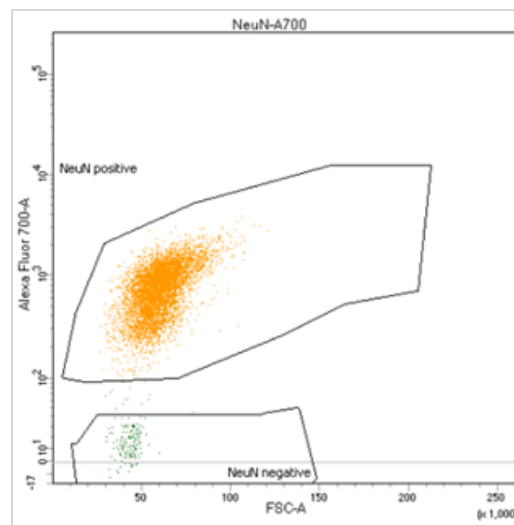**NeuN- fraction**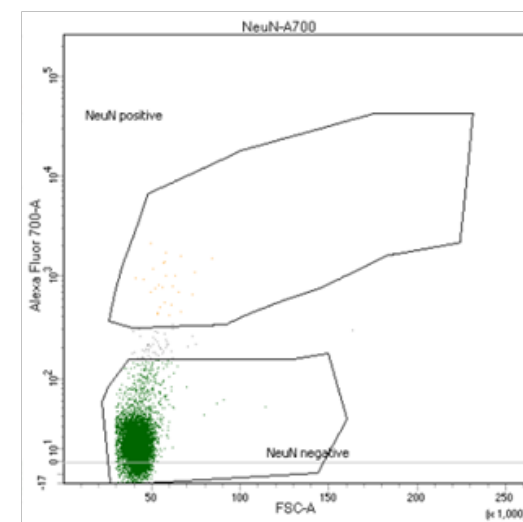**c.**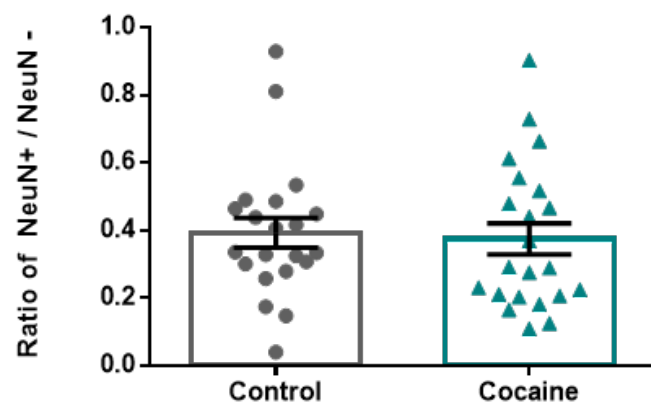**d.**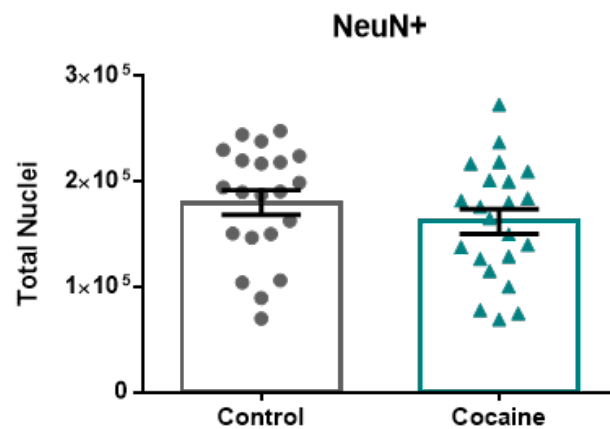**e.**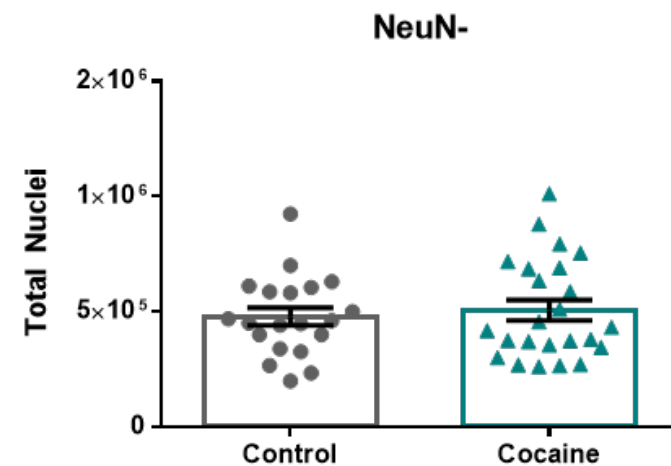

Supplement: NIHMS1634345-supplement-6.pdf [file NIHMS1634345-supplement-6.pdf]

**a.**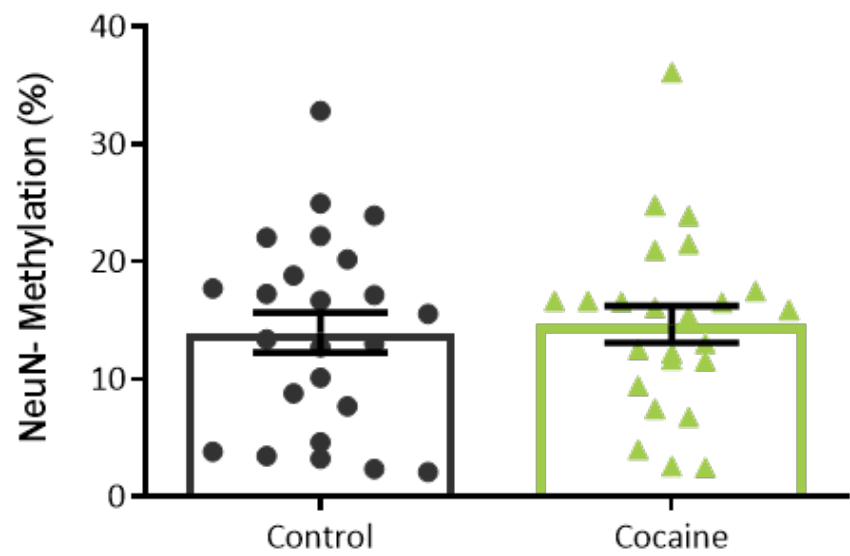**b.**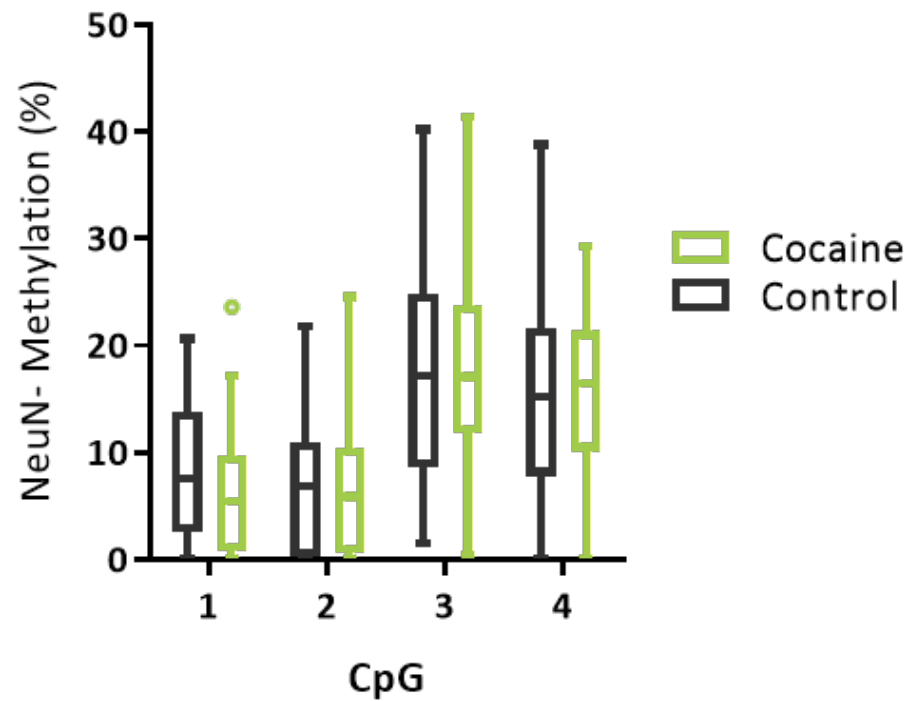

Supplement: NIHMS1634345-supplement-7.pdf [file NIHMS1634345-supplement-7.pdf]

**a.****Cocaine**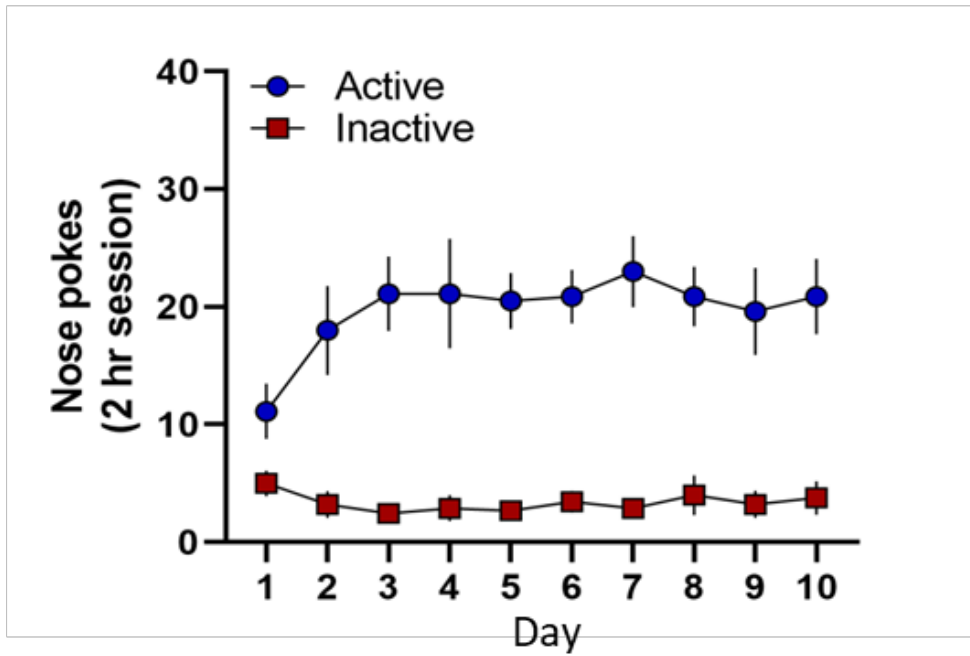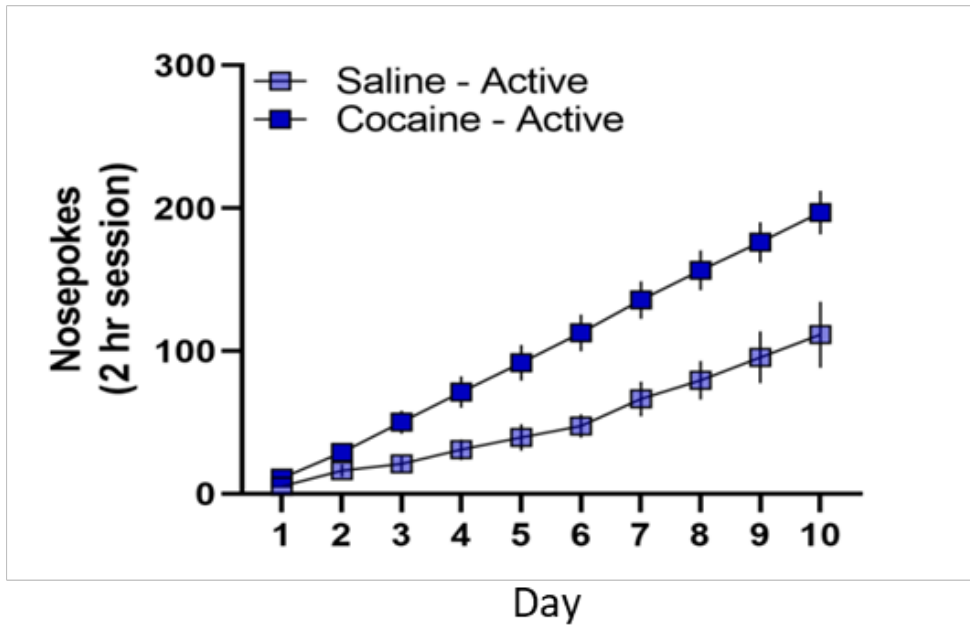**b.****Saccharin**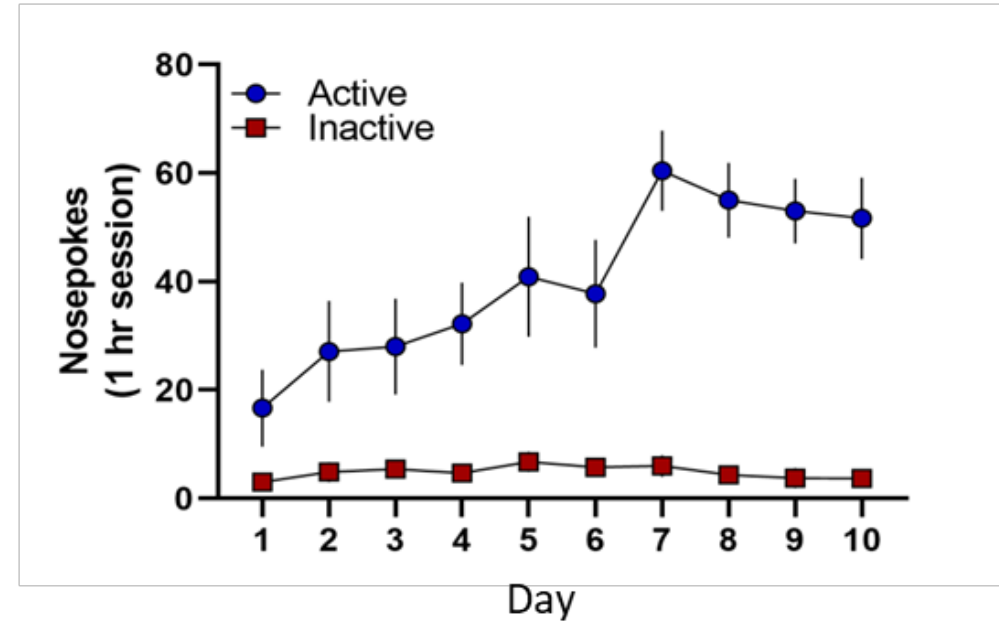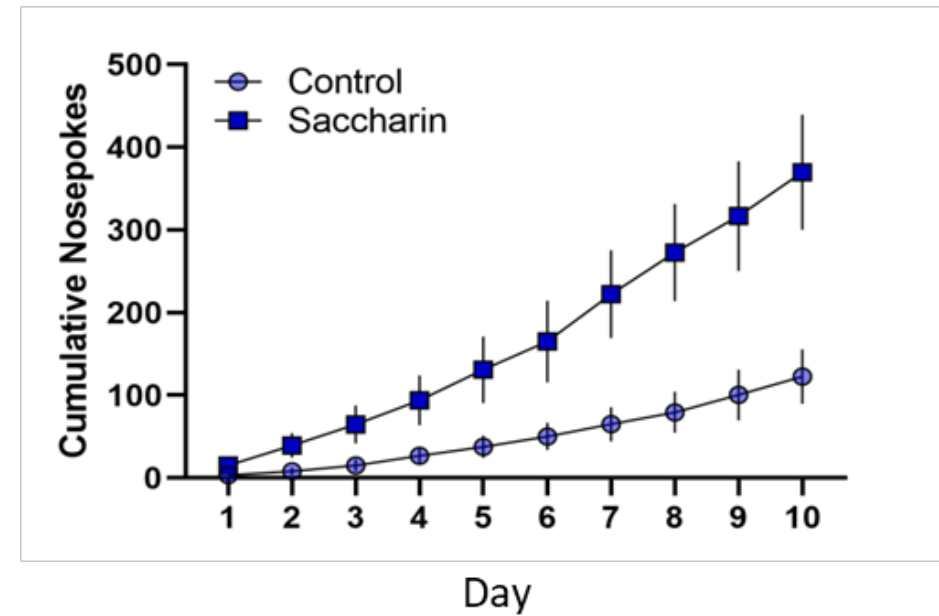

Supplement: NIHMS1634345-supplement-8.pdf [file NIHMS1634345-supplement-8.pdf]

*Irx2*

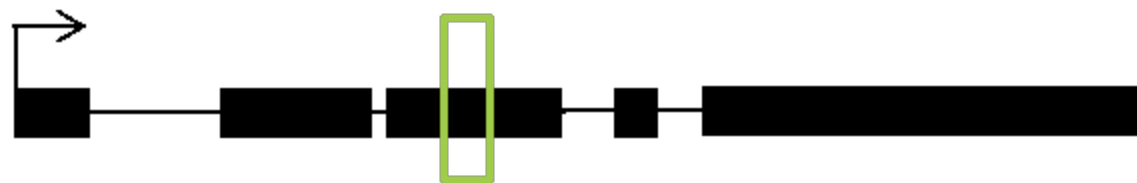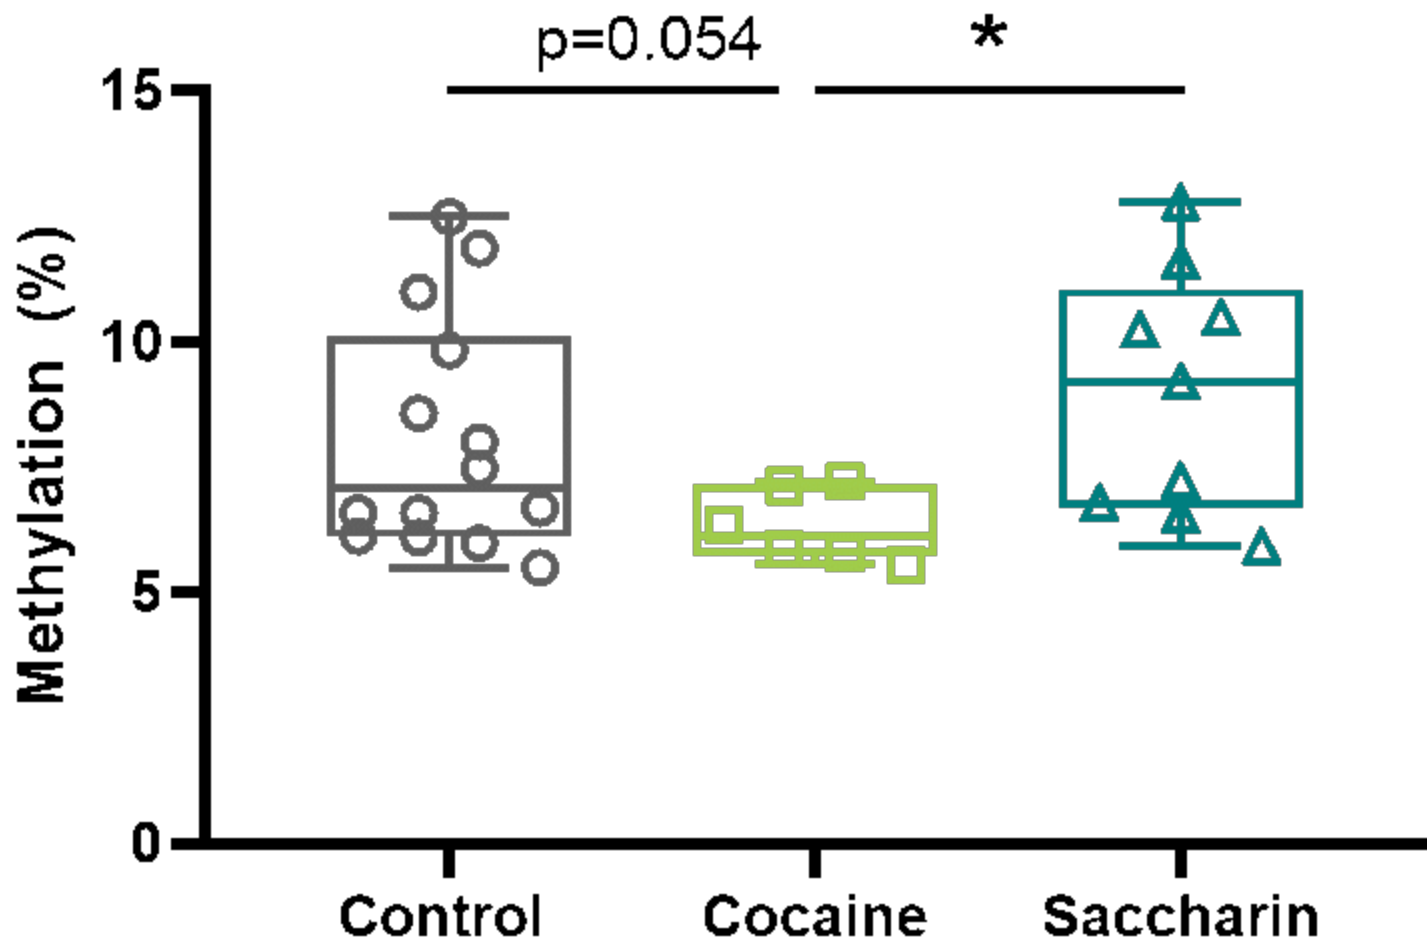

Supplement: NIHMS1634345-supplement-9.pdf [file NIHMS1634345-supplement-9.pdf]
